# Supplementary material for: Thromboembolic Events after COVID-19 Vaccination: An Italian Retrospective Real-World Safety Study
Source: MDPI journal article supplement (doi:10.3390/vaccines11101575), 2023-10-10
Supplement: s1 [file s1]

**Table S1.** Events of COVID-19 vaccines reported in vascular cases of Campania Region from December 27<sup>th</sup>, 2020 to September 27<sup>th</sup>, 2022.

| Adverse events          | Oxford–<br>AstraZeneca | Janssen | Moderna | Pfizer-<br>BioNtech | Total |
|-------------------------|------------------------|---------|---------|---------------------|-------|
| Headache                | 26                     | 0       | 10      | 79                  | 115   |
| Hypertension            | 21                     | 0       | 13      | 59                  | 93    |
| Fever                   | 33                     | 0       | 10      | 39                  | 82    |
| Hypotension             | 6                      | 1       | 6       | 48                  | 61    |
| Tachycardia             | 15                     | 3       | 6       | 32                  | 56    |
| Hot flashes             | 6                      | 0       | 5       | 42                  | 53    |
| Blush                   | 7                      | 0       | 12      | 33                  | 52    |
| Nausea                  | 4                      | 0       | 6       | 30                  | 40    |
| Hypertensive crisis     | 6                      | 0       | 3       | 29                  | 38    |
| Hematoma                | 11                     | 2       | 5       | 20                  | 38    |
| Chills                  | 12                     | 0       | 3       | 22                  | 37    |
| Asthenia                | 6                      | 1       | 5       | 23                  | 35    |
| Injection site pain     | 3                      | 0       | 4       | 26                  | 33    |
| Fatigue                 | 9                      | 0       | 5       | 18                  | 32    |
| Arm pain                | 3                      | 0       | 4       | 23                  | 30    |
| Itch                    | 6                      | 0       | 7       | 15                  | 28    |
| Arterial hypertension   | 5                      | 0       | 3       | 15                  | 23    |
| Myalgia                 | 5                      | 0       | 2       | 14                  | 21    |
| Facial redness          | 4                      | 0       | 0       | 17                  | 21    |
| Vomit                   | 5                      | 1       | 5       | 9                   | 20    |
| Diarrhea                | 2                      | 0       | 4       | 12                  | 18    |
| Muscle pain             | 5                      | 0       | 2       | 10                  | 17    |
| Paranesthesia           | 2                      | 0       | 0       | 15                  | 17    |
| Thrombosis              | 8                      | 1       | 2       | 6                   | 17    |
| Vertigo                 | 3                      | 1       | 4       | 9                   | 17    |
| Joint pain              | 6                      | 0       | 0       | 10                  | 16    |
| Arthralgia              | 4                      | 0       | 0       | 11                  | 15    |
| Dizziness               | 4                      | 0       | 0       | 11                  | 15    |
| Dyspnoea                | 5                      | 0       | 1       | 9                   | 15    |
| Migraine                | 3                      | 0       | 4       | 8                   | 15    |
| General malaise         | 4                      | 0       | 3       | 8                   | 15    |
| Syncope                 | 2                      | 1       | 5       | 5                   | 13    |
| Exhaustion              | 5                      | 0       | 0       | 7                   | 12    |
| Orthostatic hypotension | 1                      | 5       | 3       | 2                   | 11    |
| Vasculitis              | 5                      | 1       | 2       | 3                   | 11    |
| Bradycardia             | 1                      | 0       | 4       | 5                   | 10    |
| Chills of cold          | 0                      | 0       | 2       | 8                   | 10    |
| Chest pain              | 2                      | 0       | 5       | 3                   | 10    |
| Generalized joint pain  | 3                      | 0       | 2       | 5                   | 10    |

|                              |   |   |   |   |    |
|------------------------------|---|---|---|---|----|
| Rash                         | 0 | 0 | 3 | 7 | 10 |
| Hyperpyrexia                 | 4 | 0 | 3 | 3 | 10 |
| Pre-syncope                  | 0 | 5 | 3 | 2 | 10 |
| Perspiration                 | 1 | 0 | 0 | 9 | 10 |
| Venous thrombosis            | 3 | 0 | 1 | 6 | 10 |
| Chest pain                   | 0 | 0 | 3 | 6 | 9  |
| Generalized muscle pain      | 4 | 0 | 0 | 5 | 9  |
| Cold feet                    | 5 | 0 | 0 | 4 | 9  |
| Blurred vision               | 4 | 0 | 0 | 4 | 8  |
| Leg pain                     | 3 | 0 | 0 | 5 | 8  |
| Injection site edema         | 0 | 0 | 2 | 6 | 8  |
| Pallor                       | 1 | 0 | 2 | 5 | 8  |
| Paresthesia of the limbs     | 1 | 1 | 2 | 4 | 8  |
| Tremors                      | 1 | 0 | 2 | 5 | 8  |
| Arthromyalgia                | 4 | 0 | 0 | 3 | 7  |
| Pain                         | 3 | 0 | 2 | 2 | 7  |
| Abdominal pain               | 4 | 1 | 0 | 2 | 7  |
| Phlebitis                    | 2 | 0 | 2 | 3 | 7  |
| Malaise                      | 0 | 0 | 0 | 7 | 7  |
| Pyrexia                      | 3 | 0 | 1 | 3 | 7  |
| Gasp                         | 2 | 0 | 3 | 2 | 7  |
| Thrombophlebitis             | 1 | 1 | 1 | 4 | 7  |
| Thrombophlebitis of the leg  | 4 | 0 | 0 | 3 | 7  |
| Deep vein thrombosis         | 3 | 0 | 2 | 2 | 7  |
| Acrocyanosis                 | 2 | 0 | 1 | 3 | 6  |
| Pulmonary embolism           | 1 | 0 | 4 | 1 | 6  |
| Infarct                      | 1 | 0 | 0 | 5 | 6  |
| Livid                        | 1 | 0 | 3 | 2 | 6  |
| Urticaria                    | 0 | 0 | 0 | 6 | 6  |
| Thrombocytopenia             | 2 | 1 | 2 | 1 | 6  |
| Sleepiness                   | 2 | 0 | 1 | 3 | 6  |
| Arrhythmia                   | 0 | 0 | 2 | 3 | 5  |
| Throat constriction          | 0 | 0 | 0 | 5 | 5  |
| Abdominal cramps             | 1 | 0 | 0 | 4 | 5  |
| Reddened skin                | 0 | 0 | 1 | 4 | 5  |
| Increased fibrin D-dimer     | 2 | 0 | 1 | 2 | 5  |
| Weakness                     | 4 | 0 | 0 | 1 | 5  |
| Back pain                    | 2 | 0 | 2 | 1 | 5  |
| Pain at the vaccination site | 1 | 0 | 0 | 4 | 5  |
| Epistaxis                    | 1 | 0 | 1 | 3 | 5  |
| Erythema                     | 2 | 0 | 1 | 2 | 5  |
| Feverish                     | 0 | 0 | 0 | 5 | 5  |
| Pressure fluctuation         | 0 | 0 | 1 | 4 | 5  |
| Localized tingling           | 1 | 0 | 1 | 3 | 5  |

|                                      |   |   |   |   |   |
|--------------------------------------|---|---|---|---|---|
| Swelling of the limb                 | 0 | 0 | 3 | 2 | 5 |
| Hyperemia                            | 1 | 0 | 0 | 4 | 5 |
| Headache with a feeling of heaviness | 0 | 0 | 1 | 4 | 5 |
| Paresthesia of lower limb            | 0 | 0 | 2 | 3 | 5 |
| Loss of consciousness                | 0 | 0 | 0 | 5 | 5 |
| Presyncope                           | 0 | 0 | 1 | 4 | 5 |
| Feeling cold                         | 3 | 0 | 1 | 1 | 5 |
| Tremor                               | 3 | 0 | 1 | 1 | 5 |
| Thrombosis of the leg                | 2 | 0 | 0 | 3 | 5 |
| Thrombosis of the saphenous vein     | 4 | 0 | 0 | 1 | 5 |
| Hot flush                            | 2 | 0 | 0 | 3 | 5 |
| Hot flashes in the legs              | 2 | 0 | 0 | 3 | 5 |
| Increased blood pressure             | 1 | 0 | 0 | 3 | 4 |
| Broken capillary                     | 3 | 0 | 0 | 1 | 4 |
| Retching                             | 0 | 0 | 1 | 3 | 4 |
| Confusion                            | 1 | 0 | 1 | 2 | 4 |
| Elevated fibrin D-dimer              | 3 | 0 | 1 | 0 | 4 |
| Difficulty breathing                 | 0 | 0 | 0 | 4 | 4 |
| Pain in one limb                     | 1 | 0 | 1 | 2 | 4 |
| Calf pain                            | 1 | 0 | 1 | 2 | 4 |
| Leg pain                             | 0 | 0 | 1 | 3 | 4 |
| Red-spotted rash                     | 0 | 0 | 0 | 4 | 4 |
| Cold ends                            | 0 | 0 | 1 | 3 | 4 |
| Tingling of feet/hands               | 2 | 0 | 0 | 2 | 4 |
| Swelling in the limbs                | 2 | 0 | 0 | 2 | 4 |
| Swelling of the feet                 | 0 | 0 | 1 | 3 | 4 |
| Lack of appetite                     | 1 | 0 | 2 | 1 | 4 |
| Hyposthenia                          | 1 | 0 | 0 | 3 | 4 |
| Ischemia                             | 2 | 0 | 1 | 1 | 4 |
| Lymphedema                           | 0 | 0 | 1 | 3 | 4 |
| Lymphadenopathy                      | 1 | 0 | 0 | 3 | 4 |
| Enlarged lymph nodes                 | 0 | 0 | 0 | 4 | 4 |
| Sore throat                          | 1 | 0 | 1 | 2 | 4 |
| Facial paresthesia                   | 0 | 0 | 1 | 3 | 4 |
| Blood loss                           | 3 | 0 | 1 | 0 | 4 |
| Petechiae                            | 1 | 0 | 1 | 2 | 4 |
| Labile blood pressure                | 2 | 1 | 0 | 1 | 4 |
| Itching at the injection site        | 0 | 0 | 1 | 3 | 4 |
| Bleeding                             | 1 | 0 | 1 | 2 | 4 |
| Confusion                            | 1 | 0 | 0 | 3 | 4 |
| Stunning                             | 0 | 1 | 0 | 3 | 4 |
| Excessive sweating                   | 0 | 0 | 0 | 4 | 4 |
| Tinnitus                             | 0 | 1 | 1 | 2 | 4 |

|                                |   |   |   |   |   |
|--------------------------------|---|---|---|---|---|
| Cough                          | 0 | 0 | 1 | 3 | 4 |
| Deep vein thrombosis of a limb | 1 | 1 | 1 | 1 | 4 |
| Blurred vision                 | 1 | 0 | 1 | 2 | 4 |
| Temperature increase           | 0 | 0 | 2 | 1 | 3 |
| Boils                          | 1 | 0 | 0 | 2 | 3 |
| Burning in the leg             | 0 | 0 | 0 | 3 | 3 |
| Persistent headache            | 2 | 0 | 0 | 1 | 3 |
| Blood clot                     | 3 | 0 | 0 | 0 | 3 |
| Cramps                         | 1 | 0 | 0 | 2 | 3 |
| Vasovagal crisis               | 1 | 0 | 0 | 2 | 3 |
| Diplopia                       | 3 | 0 | 0 | 0 | 3 |
| Capillary disorder             | 0 | 0 | 0 | 3 | 3 |
| Pain in the lower extremities  | 2 | 0 | 0 | 1 | 3 |
| Neck pain                      | 0 | 0 | 0 | 3 | 3 |
| Foot pain                      | 2 | 0 | 0 | 1 | 3 |
| Chest pain                     | 1 | 0 | 1 | 1 | 3 |
| Bone pain                      | 0 | 0 | 1 | 2 | 3 |
| Edema of the lower extremities | 1 | 0 | 1 | 1 | 3 |
| Hemorrhage                     | 0 | 0 | 0 | 3 | 3 |
| Increased fibrinogen           | 2 | 0 | 1 | 0 | 3 |
| Tingling of the hand           | 1 | 0 | 1 | 1 | 3 |
| Dizziness                      | 2 | 0 | 0 | 1 | 3 |
| Swelling of the face           | 0 | 0 | 0 | 3 | 3 |
| Swelling of the tongue         | 1 | 0 | 2 | 0 | 3 |
| Swelling of the legs           | 1 | 0 | 1 | 1 | 3 |
| NAS swelling                   | 0 | 0 | 2 | 1 | 3 |
| Enlarged lymph nodes           | 1 | 0 | 1 | 1 | 3 |
| Venous insufficiency           | 0 | 0 | 1 | 2 | 3 |
| Localized numbness             | 0 | 0 | 0 | 3 | 3 |
| Diastolic hypertension         | 2 | 0 | 0 | 1 | 3 |
| Arterial hypotension           | 0 | 0 | 1 | 2 | 3 |
| Hypothermia                    | 1 | 0 | 1 | 1 | 3 |
| Swollen lymph nodes            | 0 | 0 | 1 | 2 | 3 |
| Stomach ache                   | 1 | 0 | 0 | 2 | 3 |
| Back pain                      | 0 | 0 | 0 | 3 | 3 |
| Cold hands and feet            | 1 | 0 | 0 | 2 | 3 |
| Swollen eyes                   | 1 | 0 | 0 | 2 | 3 |
| Tightness in the chest         | 1 | 0 | 2 | 0 | 3 |
| Paresthesia of the tongue      | 0 | 0 | 0 | 3 | 3 |
| Paresthesia of the lips        | 1 | 0 | 1 | 1 | 3 |
| Upper limb paresthesia         | 1 | 0 | 0 | 2 | 3 |
| Semi-fainting                  | 1 | 0 | 0 | 2 | 3 |
| Feeling of warmth              | 1 | 0 | 1 | 1 | 3 |

|                                    |   |   |   |   |   |
|------------------------------------|---|---|---|---|---|
| Feeling cold in the limbs          | 0 | 0 | 0 | 3 | 3 |
| Cold sweat                         | 0 | 0 | 3 | 0 | 3 |
| Faint                              | 1 | 0 | 1 | 1 | 3 |
| Thrombus                           | 1 | 0 | 0 | 2 | 3 |
| Deep vein thrombosis (limbs)       | 1 | 0 | 0 | 2 | 3 |
| Varicosity                         | 0 | 0 | 1 | 2 | 3 |
| Diminished vision                  | 1 | 0 | 0 | 2 | 3 |
| Fatigue                            | 1 | 0 | 0 | 1 | 2 |
| Ageusia                            | 0 | 0 | 0 | 2 | 2 |
| Anemia                             | 0 | 0 | 1 | 1 | 2 |
| Angioedema                         | 0 | 0 | 0 | 2 | 2 |
| Anosmia                            | 0 | 0 | 0 | 2 | 2 |
| Anxiety                            | 0 | 0 | 1 | 1 | 2 |
| Sore joints                        | 0 | 0 | 2 | 0 | 2 |
| Swollen arm                        | 0 | 0 | 2 | 0 | 2 |
| Burning skin                       | 1 | 0 | 0 | 1 | 2 |
| Burning at the time of vaccination | 0 | 0 | 0 | 2 | 2 |
| Chest burning                      | 0 | 0 | 1 | 1 | 2 |
| Frontal headache                   | 0 | 0 | 0 | 2 | 2 |
| Cervicalgia                        | 0 | 0 | 0 | 2 | 2 |
| Cyanosis                           | 0 | 0 | 0 | 2 | 2 |
| Irregular menstrual cycle          | 0 | 0 | 0 | 2 | 2 |
| Circulatory collapse               | 1 | 0 | 0 | 1 | 2 |
| Hypotensive crisis                 | 1 | 0 | 0 | 1 | 2 |
| Dyspepsia                          | 0 | 0 | 0 | 2 | 2 |
| Speech disorder                    | 1 | 0 | 0 | 1 | 2 |
| Movement disorder                  | 0 | 0 | 1 | 1 | 2 |
| Speech disorder                    | 1 | 0 | 0 | 1 | 2 |
| Hearing disorder                   | 1 | 0 | 0 | 1 | 2 |
| Dysuria                            | 0 | 0 | 0 | 2 | 2 |
| Pain in one limb                   | 0 | 0 | 1 | 1 | 2 |
| Pain in the limbs                  | 1 | 0 | 1 | 0 | 2 |
| Armpit pain                        | 0 | 0 | 1 | 1 | 2 |
| Pain in the groin                  | 0 | 0 | 0 | 2 | 2 |
| Ear pain                           | 1 | 0 | 0 | 1 | 2 |
| Ankle pain                         | 1 | 0 | 0 | 1 | 2 |
| Leg pain                           | 0 | 0 | 0 | 2 | 2 |
| Pain in the hand                   | 1 | 0 | 0 | 1 | 2 |
| Widespread pain                    | 0 | 0 | 1 | 1 | 2 |
| Generalized pain                   | 0 | 0 | 0 | 2 | 2 |
| Intercostal pain                   | 2 | 0 | 0 | 0 | 2 |
| Retrosternal pain                  | 1 | 0 | 1 | 0 | 2 |
| Cardiac chest pain                 | 1 | 0 | 1 | 0 | 2 |

|                             |   |   |   |   |   |
|-----------------------------|---|---|---|---|---|
| Generalized pain            | 1 | 0 | 0 | 1 | 2 |
| Ecchymosis                  | 0 | 0 | 2 | 0 | 2 |
| Eczema                      | 0 | 0 | 2 | 0 | 2 |
| Edema                       | 0 | 0 | 1 | 1 | 2 |
| Edema of the lips           | 2 | 0 | 0 | 0 | 2 |
| Edema at the injection site | 0 | 0 | 0 | 2 | 2 |
| Hemiplegia                  | 0 | 0 | 1 | 1 | 2 |
| Cerebral hemorrhage         | 1 | 0 | 0 | 1 | 2 |
| Enteritis                   | 0 | 0 | 0 | 2 | 2 |
| Epigastralgia               | 1 | 0 | 0 | 1 | 2 |
| Spotted rash                | 0 | 0 | 0 | 2 | 2 |
| Raynaud's phenomenon        | 0 | 0 | 0 | 2 | 2 |
| Floppiness                  | 0 | 0 | 0 | 2 | 2 |
| Shortness of breath         | 0 | 0 | 1 | 1 | 2 |
| Atrial fibrillation         | 1 | 0 | 0 | 1 | 2 |
| Phlebitis of the lower limb | 0 | 0 | 1 | 1 | 2 |
| Abundant menstrual flow     | 0 | 0 | 0 | 2 | 2 |
| End tingling                | 0 | 0 | 1 | 1 | 2 |
| Capillary fragility         | 0 | 0 | 1 | 1 | 2 |
| Swelling of the face        | 1 | 0 | 0 | 1 | 2 |
| Swelling of the fingers     | 0 | 0 | 0 | 2 | 2 |
| Bitter taste                | 0 | 0 | 0 | 2 | 2 |
| Sores                       | 0 | 0 | 0 | 2 | 2 |
| Insomnia                    | 0 | 0 | 0 | 2 | 2 |
| Numbness of the limbs       | 0 | 0 | 2 | 0 | 2 |
| Numbness of the lips        | 1 | 0 | 0 | 1 | 2 |
| Hypoesthesia                | 0 | 0 | 0 | 2 | 2 |
| Axillary lymphadenopathy    | 0 | 0 | 0 | 2 | 2 |
| Skin spot                   | 0 | 0 | 2 | 0 | 2 |
| Stomach pain                | 1 | 0 | 1 | 0 | 2 |
| Cold hands                  | 0 | 0 | 1 | 1 | 2 |
| Obnubilation                | 0 | 0 | 1 | 1 | 2 |
| Arterial obstruction NAS    | 1 | 0 | 1 | 0 | 2 |
| Palpitation                 | 0 | 0 | 0 | 2 | 2 |
| Palpitations                | 1 | 0 | 0 | 1 | 2 |
| Arm paralysis               | 0 | 0 | 1 | 1 | 2 |
| Bell's palsy                | 0 | 0 | 0 | 2 | 2 |
| Hair loss                   | 0 | 0 | 0 | 2 | 2 |
| Weight loss                 | 0 | 0 | 1 | 1 | 2 |
| Pericarditis                | 0 | 0 | 1 | 1 | 2 |
| Walnuts                     | 0 | 0 | 1 | 1 | 2 |
| Increased blood pressure    | 0 | 0 | 2 | 0 | 2 |
| Low blood pressure          | 0 | 0 | 1 | 1 | 2 |
| Increased protein C         | 1 | 0 | 1 | 0 | 2 |
| Diffuse itching             | 0 | 0 | 0 | 2 | 2 |

|                                  |   |   |   |   |   |
|----------------------------------|---|---|---|---|---|
| Facial itching                   | 0 | 0 | 0 | 2 | 2 |
| Localized itching                | 0 | 0 | 1 | 1 | 2 |
| Allergic reaction                | 1 | 0 | 0 | 1 | 2 |
| Injection site reaction          | 1 | 0 | 0 | 1 | 2 |
| Difficulty breathing             | 0 | 0 | 0 | 2 | 2 |
| Shortness                        | 2 | 0 | 0 | 0 | 2 |
| Muscle stiffness                 | 0 | 0 | 1 | 1 | 2 |
| Retention                        | 0 | 0 | 1 | 1 | 2 |
| Ringing in your ears             | 0 | 0 | 1 | 1 | 2 |
| Generalized redness              | 0 | 0 | 2 | 0 | 2 |
| Sensation of warmth in the face  | 0 | 0 | 0 | 2 | 2 |
| Feeling cold in the extremities  | 1 | 0 | 0 | 1 | 2 |
| Feeling groggy                   | 0 | 0 | 0 | 2 | 2 |
| Sensation of hot flashes         | 2 | 0 | 0 | 0 | 2 |
| Sense of oppression              | 2 | 0 | 0 | 0 | 2 |
| Spasms                           | 0 | 0 | 0 | 2 | 2 |
| Increased sweating               | 0 | 0 | 0 | 2 | 2 |
| Thrombocytopenia                 | 2 | 0 | 0 | 0 | 2 |
| Thromboembolism                  | 0 | 1 | 0 | 1 | 2 |
| Arterial thrombosis of a limb    | 1 | 0 | 0 | 1 | 2 |
| Deep vein thrombosis of the leg  | 1 | 0 | 0 | 1 | 2 |
| Deep femoral vein thrombosis     | 0 | 0 | 1 | 1 | 2 |
| Swelling                         | 0 | 0 | 0 | 2 | 2 |
| Injection site swelling          | 0 | 0 | 0 | 2 | 2 |
| Swelling at the vaccination site | 0 | 0 | 0 | 2 | 2 |
| Deep venous thrombosis (DVT)     | 1 | 0 | 0 | 1 | 2 |
| Vasculitis of the legs           | 2 | 0 | 0 | 0 | 2 |
| Peripheral vasoconstriction      | 0 | 0 | 0 | 2 | 2 |
| Lowering the voice               | 0 | 0 | 0 | 1 | 1 |
| Pressure lowering                | 0 | 0 | 1 | 0 | 1 |
| Lowering blood pressure          | 0 | 0 | 1 | 0 | 1 |
| Cardiac acceleration             | 0 | 0 | 1 | 0 | 1 |
| Aphasia                          | 0 | 0 | 0 | 1 | 1 |
| Aphtha                           | 0 | 0 | 0 | 1 | 1 |
| Psychomotor agitation            | 0 | 0 | 0 | 1 | 1 |
| Allergy                          | 1 | 0 | 0 | 0 | 1 |
| Olfactory hallucination          | 1 | 0 | 0 | 0 | 1 |
| Hallucinations                   | 0 | 0 | 0 | 1 | 1 |
| Skin discoloration               | 0 | 0 | 1 | 0 | 1 |
| Altered erection                 | 0 | 0 | 0 | 1 | 1 |

|                               |   |   |   |   |   |
|-------------------------------|---|---|---|---|---|
| Alteration of smell           | 1 | 0 | 0 | 0 | 1 |
| Altered attention             | 0 | 0 | 1 | 0 | 1 |
| Amenorrhea                    | 1 | 0 | 0 | 0 | 1 |
| Transient amnesia             | 1 | 0 | 0 | 0 | 1 |
| Anaphylaxis                   | 0 | 0 | 0 | 1 | 1 |
| Antithrombin III increased    | 1 | 0 | 0 | 0 | 1 |
| Reduced appetite              | 1 | 0 | 0 | 0 | 1 |
| Extended APTT                 | 1 | 0 | 0 | 0 | 1 |
| Cardiac arrest                | 0 | 0 | 0 | 1 | 1 |
| Reddening                     | 0 | 0 | 0 | 1 | 1 |
| Skin redness                  | 0 | 0 | 0 | 1 | 1 |
| Redness of the face           | 0 | 0 | 0 | 1 | 1 |
| Redness at the injection site | 0 | 0 | 0 | 1 | 1 |
| Septic arthritis              | 0 | 0 | 1 | 0 | 1 |
| Abscess at the injection site | 0 | 0 | 0 | 1 | 1 |
| Ascites                       | 0 | 0 | 0 | 1 | 1 |
| Pale appearance               | 0 | 0 | 0 | 1 | 1 |
| Atherosclerosis of the aorta  | 0 | 0 | 0 | 1 | 1 |
| Atony                         | 0 | 0 | 0 | 1 | 1 |
| Panic attacks                 | 0 | 0 | 1 | 0 | 1 |
| Sweating attack               | 0 | 0 | 0 | 1 | 1 |
| Transient ischemic attack     | 0 | 0 | 0 | 1 | 1 |
| Abnormal weight gain          | 0 | 0 | 0 | 1 | 1 |
| Increased blood basophils     | 1 | 0 | 0 | 0 | 1 |
| Added beats                   | 1 | 0 | 0 | 0 | 1 |
| Device lock                   | 0 | 0 | 1 | 0 | 1 |
| Dry mouth                     | 0 | 0 | 1 | 0 | 1 |
| Chills of fever               | 0 | 0 | 0 | 1 | 1 |
| Burning eyes                  | 1 | 0 | 0 | 0 | 1 |
| Breast burning                | 0 | 0 | 1 | 0 | 1 |
| Fall                          | 0 | 0 | 0 | 1 | 1 |
| Falls                         | 0 | 0 | 0 | 1 | 1 |
| Heat at the injection site    | 0 | 0 | 0 | 1 | 1 |
| Hypertensive heart disease    | 0 | 0 | 0 | 1 | 1 |
| Swollen ankles                | 0 | 0 | 1 | 0 | 1 |
| Exertional headache           | 1 | 0 | 0 | 0 | 1 |
| NAS headache                  | 0 | 0 | 0 | 1 | 1 |
| Occipital headache            | 0 | 0 | 0 | 1 | 1 |
| Cephalgia                     | 0 | 0 | 0 | 1 | 1 |
| Red patches                   | 1 | 0 | 0 | 0 | 1 |
| Cystitis                      | 0 | 0 | 0 | 1 | 1 |
| Claudication                  | 0 | 0 | 0 | 1 | 1 |
| Reduced HDL cholesterol       | 1 | 0 | 0 | 0 | 1 |
| Abdominal colic               | 1 | 0 | 0 | 0 | 1 |
| Confabulation                 | 0 | 0 | 0 | 1 | 1 |

|                                   |   |   |   |   |   |
|-----------------------------------|---|---|---|---|---|
| Conjunctivitis                    | 0 | 0 | 1 | 0 | 1 |
| Decreased platelet count          | 1 | 0 | 0 | 0 | 1 |
| Muscle contraction                | 0 | 0 | 1 | 0 | 1 |
| Increased uterine contractions    | 0 | 0 | 0 | 1 | 1 |
| Tightening to the chest           | 1 | 0 | 0 | 0 | 1 |
| Constriction of the chest         | 0 | 0 | 0 | 1 | 1 |
| Chest constriction                | 0 | 0 | 0 | 1 | 1 |
| Leg cramps                        | 0 | 0 | 0 | 1 | 1 |
| Cramps of the lower extremities   | 1 | 0 | 0 | 0 | 1 |
| Foot cramps                       | 0 | 0 | 0 | 1 | 1 |
| Intestinal cramps                 | 1 | 0 | 0 | 0 | 1 |
| Absence crisis                    | 0 | 0 | 0 | 1 | 1 |
| Epileptic seizure                 | 0 | 0 | 0 | 1 | 1 |
| Rough skin                        | 0 | 0 | 1 | 0 | 1 |
| Dry skin                          | 0 | 0 | 0 | 1 | 1 |
| Abnormal fibrin D-dimer           | 1 | 0 | 0 | 0 | 1 |
| Weakness of the upper extremities | 0 | 0 | 0 | 1 | 1 |
| Muscle weakness                   | 0 | 0 | 0 | 1 | 1 |
| Death from natural causes         | 0 | 0 | 1 | 0 | 1 |
| Motor deficit                     | 0 | 0 | 1 | 0 | 1 |
| Difficult swallowing              | 0 | 0 | 0 | 1 | 1 |
| Painful swallowing                | 0 | 0 | 0 | 1 | 1 |
| Delirium                          | 1 | 0 | 0 | 0 | 1 |
| Depression                        | 0 | 0 | 0 | 1 | 1 |
| Dermatomyositis                   | 0 | 0 | 0 | 1 | 1 |
| Head and gaze deviation           | 0 | 0 | 0 | 1 | 1 |
| Diabetes                          | 0 | 0 | 0 | 1 | 1 |
| Watery diarrhea                   | 1 | 0 | 0 | 0 | 1 |
| Blood diarrhea                    | 1 | 0 | 0 | 0 | 1 |
| Difficulty walking                | 0 | 0 | 0 | 1 | 1 |
| Difficulty sleeping               | 0 | 0 | 0 | 1 | 1 |
| Difficulty walking                | 0 | 0 | 0 | 1 | 1 |
| Difficulty chewing                | 0 | 0 | 1 | 0 | 1 |
| Inferior vena cava dilatation     | 0 | 0 | 0 | 1 | 1 |
| Dysarthria                        | 0 | 0 | 0 | 1 | 1 |
| Dysesthesia of a limb             | 1 | 0 | 0 | 0 | 1 |
| Dehydration                       | 0 | 0 | 1 | 0 | 1 |
| Disorientation                    | 0 | 0 | 0 | 1 | 1 |
| Peripheral artery dissection      | 0 | 0 | 0 | 1 | 1 |
| Visual disturbances               | 1 | 0 | 0 | 0 | 1 |
| Heart disorder                    | 1 | 0 | 0 | 0 | 1 |
| Eye disorder                      | 0 | 0 | 0 | 1 | 1 |

|                                    |   |   |   |   |   |
|------------------------------------|---|---|---|---|---|
| Bleeding disorder                  | 0 | 0 | 0 | 1 | 1 |
| Swallowing disorder                | 0 | 0 | 0 | 1 | 1 |
| Menstrual disorder                 | 0 | 0 | 0 | 1 | 1 |
| Visual disturbance                 | 0 | 0 | 0 | 1 | 1 |
| Stiff fingers                      | 0 | 0 | 1 | 0 | 1 |
| Decreased diuresis                 | 0 | 0 | 0 | 1 | 1 |
| Tooth pain                         | 0 | 0 | 0 | 1 | 1 |
| Pain in the head                   | 1 | 0 | 0 | 0 | 1 |
| Scalp pain                         | 0 | 0 | 0 | 1 | 1 |
| Pain in the side                   | 0 | 0 | 1 | 0 | 1 |
| Hip pain                           | 0 | 0 | 0 | 1 | 1 |
| Thigh pain                         | 0 | 0 | 0 | 1 | 1 |
| Pain in the face                   | 0 | 0 | 0 | 1 | 1 |
| Throat pain                        | 0 | 0 | 1 | 0 | 1 |
| Buttock pain                       | 1 | 0 | 0 | 0 | 1 |
| Ankle pain                         | 0 | 0 | 0 | 1 | 1 |
| Stomach pain                       | 0 | 0 | 0 | 1 | 1 |
| Joint pain at the injection site   | 0 | 1 | 0 | 0 | 1 |
| Joint pain at the vaccination site | 0 | 0 | 0 | 1 | 1 |
| Axillary pain                      | 0 | 0 | 0 | 1 | 1 |
| Cervical pain                      | 0 | 0 | 0 | 1 | 1 |
| Stomach pain                       | 1 | 0 | 0 | 0 | 1 |
| Back pain                          | 1 | 0 | 0 | 0 | 1 |
| Pain during injection              | 0 | 0 | 1 | 0 | 1 |
| Epigastric pain                    | 0 | 0 | 0 | 1 | 1 |
| Administration site pain           | 0 | 0 | 0 | 1 | 1 |
| Stabbing pain                      | 0 | 0 | 0 | 1 | 1 |
| Pain                               | 0 | 0 | 0 | 1 | 1 |
| Musculoskeletal pain               | 1 | 0 | 0 | 0 | 1 |
| Osteoarticular pain                | 0 | 0 | 0 | 1 | 1 |
| Precordial pain                    | 0 | 0 | 0 | 1 | 1 |
| Renal pain                         | 1 | 0 | 0 | 0 | 1 |
| Dull pain in the head              | 1 | 0 | 0 | 0 | 1 |
| Burning pain                       | 0 | 0 | 0 | 1 | 1 |
| Vascular pain                      | 1 | 0 | 0 | 0 | 1 |
| Arthritic pain                     | 0 | 0 | 0 | 1 | 1 |
| Capillary ectasia                  | 0 | 0 | 0 | 1 | 1 |
| Edema in the neck                  | 0 | 0 | 0 | 1 | 1 |
| Edema of the limbs                 | 1 | 0 | 0 | 0 | 1 |
| Edema of the lip                   | 0 | 0 | 0 | 1 | 1 |
| Edema of the face                  | 0 | 0 | 0 | 1 | 1 |
| Edema of the upper limb            | 1 | 0 | 0 | 0 | 1 |
| Ankle edema                        | 1 | 0 | 0 | 0 | 1 |
| Edema of the glottis               | 0 | 0 | 0 | 1 | 1 |

|                                           |   |   |   |   |   |
|-------------------------------------------|---|---|---|---|---|
| Edema of the throat                       | 0 | 0 | 0 | 1 | 1 |
| Edema of the fingers of the hands         | 0 | 0 | 0 | 1 | 1 |
| Edema of a lower limb                     | 0 | 0 | 1 | 0 | 1 |
| Ocular edema                              | 0 | 0 | 1 | 0 | 1 |
| Venous edema                              | 0 | 0 | 0 | 1 | 1 |
| Hematuria                                 | 0 | 0 | 0 | 1 | 1 |
| Hemiparesis                               | 1 | 0 | 0 | 0 | 1 |
| Conjunctival hemorrhage                   | 1 | 0 | 0 | 0 | 1 |
| Eye haemorrhage                           | 1 | 0 | 0 | 0 | 1 |
| Subconjunctival hemorrhage                | 0 | 0 | 0 | 1 | 1 |
| Increased blood eosinophils               | 0 | 0 | 1 | 0 | 1 |
| Hypertensive episodes                     | 0 | 0 | 0 | 1 | 1 |
| Episode of loss of consciousness          | 1 | 0 | 0 | 0 | 1 |
| Hypertensive episode                      | 0 | 0 | 0 | 1 | 1 |
| Skin erythema                             | 0 | 0 | 0 | 1 | 1 |
| Palmar erythema                           | 1 | 0 | 0 | 0 | 1 |
| Bullous rash                              | 0 | 0 | 1 | 0 | 1 |
| Facial rash                               | 0 | 0 | 0 | 1 | 1 |
| Generalized rash                          | 0 | 0 | 0 | 1 | 1 |
| Rash on the trunk                         | 0 | 0 | 0 | 1 | 1 |
| Pimple-type rash                          | 0 | 0 | 0 | 1 | 1 |
| Exacerbation of disease                   | 0 | 0 | 0 | 1 | 1 |
| Exanthema                                 | 0 | 0 | 0 | 1 | 1 |
| Ventricular extrasystole                  | 0 | 0 | 0 | 1 | 1 |
| Extrasystoles                             | 0 | 0 | 0 | 1 | 1 |
| Reddened face                             | 0 | 0 | 0 | 1 | 1 |
| Hunger                                    | 1 | 0 | 0 | 0 | 1 |
| Annoyance                                 | 0 | 0 | 0 | 1 | 1 |
| Discomfort in the head                    | 0 | 0 | 0 | 1 | 1 |
| Discomfort in the abdomen                 | 0 | 0 | 1 | 0 | 1 |
| Oral discomfort                           | 0 | 0 | 0 | 1 | 1 |
| Respiratory fatigue                       | 1 | 0 | 0 | 0 | 1 |
| Mild fever                                | 0 | 0 | 1 | 0 | 1 |
| Fatty liver                               | 0 | 0 | 0 | 1 | 1 |
| Fibrillation                              | 0 | 0 | 0 | 1 | 1 |
| Fibromyalgia                              | 0 | 0 | 0 | 1 | 1 |
| ringing in the ears                       | 0 | 0 | 1 | 0 | 1 |
| Phlebitis of the arm                      | 1 | 0 | 0 | 0 | 1 |
| Phlebolinfedema                           | 0 | 0 | 0 | 1 | 1 |
| Phlebothrombosis                          | 0 | 0 | 0 | 1 | 1 |
| Phlebothrombosis of the lower extremities | 0 | 0 | 0 | 1 | 1 |
| Tingling                                  | 0 | 0 | 0 | 1 | 1 |

|                                        |   |   |   |   |   |
|----------------------------------------|---|---|---|---|---|
| Tingling of the tongue                 | 1 | 0 | 0 | 0 | 1 |
| Tingling of the lips                   | 0 | 0 | 0 | 1 | 1 |
| Photophobia                            | 0 | 0 | 0 | 1 | 1 |
| Photopsy                               | 1 | 0 | 0 | 0 | 1 |
| Vascular fragility                     | 0 | 0 | 0 | 1 | 1 |
| Localized coldness                     | 0 | 0 | 1 | 0 | 1 |
| Increased heart rate                   | 1 | 0 | 0 | 0 | 1 |
| Low heart rate                         | 0 | 0 | 0 | 1 | 1 |
| Frequency of urination                 | 0 | 0 | 0 | 1 | 1 |
| Abnormal cognitive function            | 1 | 0 | 0 | 0 | 1 |
| Gingivitis                             | 0 | 0 | 0 | 1 | 1 |
| Glossitis                              | 0 | 0 | 0 | 1 | 1 |
| Abdominal bloating                     | 1 | 0 | 0 | 0 | 1 |
| Joint swelling at the vaccination site | 0 | 0 | 1 | 0 | 1 |
| Swelling of the face                   | 0 | 0 | 0 | 1 | 1 |
| Swelling of the hands                  | 1 | 0 | 0 | 0 | 1 |
| Metallic taste                         | 0 | 0 | 0 | 1 | 1 |
| Herpes NAS                             | 0 | 0 | 0 | 1 | 1 |
| Ocular herpes                          | 1 | 0 | 0 | 0 | 1 |
| Ischemic stroke                        | 0 | 0 | 0 | 1 | 1 |
| Unable to swallow                      | 0 | 0 | 0 | 1 | 1 |
| Urinary incontinence                   | 0 | 0 | 0 | 1 | 1 |
| Joint soreness                         | 0 | 0 | 1 | 0 | 1 |
| Injection site hardening               | 0 | 0 | 1 | 0 | 1 |
| Spleen infarction                      | 0 | 0 | 0 | 1 | 1 |
| Intestinal infarction                  | 0 | 0 | 0 | 1 | 1 |
| Myocardial infarction                  | 0 | 0 | 0 | 1 | 1 |
| Gastrointestinal infection             | 1 | 0 | 0 | 0 | 1 |
| Inflammation                           | 0 | 0 | 0 | 1 | 1 |
| Inflammation of the mucous membrane    | 0 | 0 | 0 | 1 | 1 |
| Inflammation of the stomach            | 0 | 0 | 0 | 1 | 1 |
| Injection site inflammation            | 1 | 0 | 0 | 0 | 1 |
| Lymph node inflammation                | 0 | 0 | 0 | 1 | 1 |
| Ocular inflammation                    | 0 | 0 | 0 | 1 | 1 |
| Instability                            | 1 | 0 | 0 | 0 | 1 |
| Lymphatic insufficiency                | 0 | 0 | 1 | 0 | 1 |
| Mitral regurgitation                   | 0 | 0 | 0 | 1 | 1 |
| Renal                                  | 1 | 0 | 0 | 0 | 1 |
| Acute renal failure                    | 0 | 0 | 1 | 0 | 1 |
| Acute on chronic renal failure         | 0 | 0 | 1 | 0 | 1 |
| Chronic venous insufficiency           | 0 | 0 | 0 | 1 | 1 |
| Peripheral venous insufficiency        | 0 | 0 | 0 | 1 | 1 |
| Interleukin 6 increased                | 1 | 0 | 0 | 0 | 1 |

|                               |   |   |   |   |   |
|-------------------------------|---|---|---|---|---|
| Numbness                      | 1 | 0 | 0 | 0 | 1 |
| Tongue numbness               | 0 | 0 | 0 | 1 | 1 |
| Azotemia                      | 1 | 0 | 0 | 0 | 1 |
| Hypercholesterolemia          | 0 | 0 | 0 | 1 | 1 |
| Hyperesthesia                 | 0 | 0 | 0 | 1 | 1 |
| Hyperhomocysteinemia          | 0 | 0 | 0 | 1 | 1 |
| Hypersalivation               | 0 | 0 | 0 | 1 | 1 |
| Hypersomnia                   | 0 | 0 | 0 | 1 | 1 |
| Aggravated hypertension       | 0 | 0 | 0 | 1 | 1 |
| NAS hypertension              | 0 | 0 | 0 | 1 | 1 |
| Venous hypertension           | 0 | 0 | 0 | 1 | 1 |
| Hypertensive                  | 0 | 0 | 0 | 1 | 1 |
| Hypertransaminasemia          | 0 | 0 | 0 | 1 | 1 |
| Hyperuricaemia                | 1 | 0 | 0 | 0 | 1 |
| Hypoglycaemia                 | 0 | 0 | 0 | 1 | 1 |
| Hyponatremia                  | 0 | 0 | 0 | 1 | 1 |
| Cerebral ischemia             | 1 | 0 | 0 | 0 | 1 |
| Chronic cerebral ischemia     | 0 | 0 | 0 | 1 | 1 |
| Ischemia NAS                  | 1 | 0 | 0 | 0 | 1 |
| Splenic ischemia              | 0 | 0 | 0 | 1 | 1 |
| Blue lips                     | 1 | 0 | 0 | 0 | 1 |
| Swollen lips                  | 0 | 0 | 0 | 1 | 1 |
| Labyrinthitis                 | 0 | 0 | 0 | 1 | 1 |
| Lachrymation                  | 0 | 0 | 0 | 1 | 1 |
| Plaintive                     | 0 | 0 | 1 | 0 | 1 |
| Acute myeloid leukemia        | 1 | 0 | 0 | 0 | 1 |
| Decreased libido              | 0 | 0 | 0 | 1 | 1 |
| Joint limitation              | 0 | 0 | 0 | 1 | 1 |
| NAS Lymphedema                | 0 | 0 | 0 | 1 | 1 |
| Generalized lymphadenopathy   | 0 | 0 | 1 | 0 | 1 |
| Submandibular lymphadenopathy | 0 | 0 | 0 | 1 | 1 |
| Enlarged axillary lymph nodes | 0 | 0 | 0 | 1 | 1 |
| Inguinal lymph nodes          | 0 | 0 | 0 | 1 | 1 |
| Lymphostasis                  | 0 | 0 | 0 | 1 | 1 |
| White tongue                  | 0 | 0 | 1 | 0 | 1 |
| Lividura                      | 0 | 0 | 0 | 1 | 1 |
| Lumbago                       | 0 | 0 | 0 | 1 | 1 |
| Lupus positive anticoagulant  | 0 | 0 | 0 | 1 | 1 |
| Reddened hands                | 0 | 0 | 0 | 1 | 1 |
| Difficult focusing            | 0 | 0 | 1 | 0 | 1 |
| Microembolism                 | 0 | 0 | 0 | 1 | 1 |
| Difficult urination           | 0 | 0 | 0 | 1 | 1 |

|                                 |   |   |   |   |   |
|---------------------------------|---|---|---|---|---|
| Myocarditis                     | 0 | 0 | 0 | 1 | 1 |
| Myodesopsia                     | 0 | 0 | 1 | 0 | 1 |
| Decreased mobility              | 0 | 0 | 0 | 1 | 1 |
| Nephritis                       | 0 | 0 | 0 | 1 | 1 |
| NAS neuropathy                  | 0 | 0 | 0 | 1 | 1 |
| Peripheral neuropathy           | 0 | 0 | 0 | 1 | 1 |
| Subcutaneous nodule             | 1 | 0 | 0 | 0 | 1 |
| Painful red eyes                | 0 | 0 | 0 | 1 | 1 |
| Cerebral artery occlusion       | 0 | 0 | 0 | 1 | 1 |
| Corneal blurring                | 0 | 0 | 1 | 0 | 1 |
| Oligoanuria                     | 0 | 0 | 0 | 1 | 1 |
| Oliguria                        | 0 | 0 | 0 | 1 | 1 |
| Chest tightness                 | 1 | 0 | 0 | 0 | 1 |
| Chest tightness                 | 0 | 0 | 0 | 1 | 1 |
| Stye                            | 1 | 0 | 0 | 0 | 1 |
| Dulling                         | 0 | 0 | 0 | 1 | 1 |
| Autoimmune pancreatitis         | 0 | 0 | 1 | 0 | 1 |
| Subacute pancreatitis           | 0 | 0 | 1 | 0 | 1 |
| Panniculitis                    | 0 | 0 | 0 | 1 | 1 |
| Right side paralysis            | 1 | 0 | 0 | 0 | 1 |
| Paralysis of the tongue         | 0 | 0 | 1 | 0 | 1 |
| Pseudobulbar paralysis          | 0 | 0 | 0 | 1 | 1 |
| Paresthesia of the mouth        | 0 | 0 | 1 | 0 | 1 |
| Pathology of teeth              | 1 | 0 | 0 | 0 | 1 |
| Pathology of the jaw            | 1 | 0 | 0 | 0 | 1 |
| Loss                            | 0 | 0 | 0 | 1 | 1 |
| Loss of taste                   | 0 | 0 | 0 | 1 | 1 |
| Loss of balance                 | 0 | 0 | 1 | 0 | 1 |
| Loss of smell                   | 0 | 0 | 0 | 1 | 1 |
| Memory loss                     | 0 | 0 | 0 | 1 | 1 |
| Vision loss                     | 1 | 0 | 0 | 0 | 1 |
| Unspecified vision loss         | 0 | 0 | 0 | 1 | 1 |
| Transient loss of consciousness | 0 | 0 | 1 | 0 | 1 |
| Menstrual losses                | 1 | 0 | 0 | 0 | 1 |
| Vaginal discharge               | 1 | 0 | 0 | 0 | 1 |
| Acute pericarditis              | 0 | 0 | 0 | 1 | 1 |
| Heaviness in the limbs          | 0 | 0 | 0 | 1 | 1 |
| Heaviness of the limbs          | 1 | 0 | 0 | 0 | 1 |
| Heaviness of the leg            | 0 | 0 | 0 | 1 | 1 |
| Burning feet                    | 0 | 0 | 0 | 1 | 1 |
| Pyrexia of unknown origin       | 1 | 0 | 0 | 0 | 1 |
| Pinching of the skin            | 0 | 0 | 0 | 1 | 1 |
| Generalized tingling            | 0 | 0 | 1 | 0 | 1 |
| Pollachiuria                    | 0 | 0 | 0 | 1 | 1 |

|                                      |   |   |   |   |   |
|--------------------------------------|---|---|---|---|---|
| Swollen wrists                       | 0 | 0 | 0 | 1 | 1 |
| Knows                                | 0 | 0 | 0 | 1 | 1 |
| Purple                               | 0 | 0 | 0 | 1 | 1 |
| Head pressure                        | 1 | 0 | 0 | 0 | 1 |
| Increased eye pressure               | 1 | 0 | 0 | 0 | 1 |
| Balance problem                      | 0 | 0 | 1 | 0 | 1 |
| Prominence of superficial vein       | 1 | 0 | 0 | 0 | 1 |
| Abnormal C-reactive protein          | 1 | 0 | 0 | 0 | 1 |
| Proteinuria                          | 0 | 0 | 0 | 1 | 1 |
| Itching - generalized                | 0 | 0 | 1 | 0 | 1 |
| Itchy eyes                           | 0 | 0 | 0 | 1 | 1 |
| Itchy eye                            | 0 | 0 | 0 | 1 | 1 |
| Skin itching                         | 0 | 0 | 1 | 0 | 1 |
| Generalized itching                  | 0 | 0 | 0 | 1 | 1 |
| Oral itching                         | 0 | 0 | 0 | 1 | 1 |
| Rachialgia                           | 0 | 0 | 0 | 1 | 1 |
| Hoarseness                           | 0 | 0 | 0 | 1 | 1 |
| Anaphylactoid reaction               | 0 | 0 | 0 | 1 | 1 |
| Reaction at the vaccination site     | 0 | 0 | 0 | 1 | 1 |
| Vagal reaction                       | 0 | 0 | 0 | 1 | 1 |
| Vasovagal reaction                   | 0 | 0 | 0 | 1 | 1 |
| Tricuspid regurgitation              | 0 | 0 | 1 | 0 | 1 |
| Regurgitation of the pulmonary valve | 0 | 0 | 1 | 0 | 1 |
| Vasomotor rhinitis                   | 0 | 0 | 0 | 1 | 1 |
| Urinary retention                    | 0 | 0 | 0 | 1 | 1 |
| Rupture of blood vessel in the eye   | 0 | 0 | 0 | 1 | 1 |
| Nosebleeds                           | 0 | 0 | 1 | 0 | 1 |
| Blood in the urine                   | 1 | 0 | 0 | 0 | 1 |
| Bleeding from the nose               | 0 | 0 | 0 | 1 | 1 |
| Low oxygen saturation                | 0 | 0 | 1 | 0 | 1 |
| Sciatica                             | 0 | 0 | 0 | 1 | 1 |
| Dry mouth                            | 0 | 0 | 0 | 1 | 1 |
| Secretion                            | 0 | 0 | 1 | 0 | 1 |
| Burning sensation in the limbs       | 0 | 0 | 0 | 1 | 1 |
| Burning sensation of the oral mucosa | 1 | 0 | 0 | 0 | 1 |
| Sensation of warmth in the limbs     | 0 | 0 | 0 | 1 | 1 |
| Dizziness feeling                    | 0 | 0 | 0 | 1 | 1 |
| Feeling of constriction              | 0 | 0 | 0 | 1 | 1 |
| Sensation of electroshock            | 0 | 0 | 1 | 0 | 1 |

|                                       |   |   |   |   |   |
|---------------------------------------|---|---|---|---|---|
| Tingling sensation                    | 1 | 0 | 0 | 0 | 1 |
| Feeling cold in the lower extremities | 1 | 0 | 0 | 0 | 1 |
| Feeling cold on the skin              | 1 | 0 | 0 | 0 | 1 |
| Sensation of chest tightness          | 1 | 0 | 0 | 0 | 1 |
| Choking sensation                     | 0 | 0 | 0 | 1 | 1 |
| Feeling of foggy head                 | 0 | 0 | 0 | 1 | 1 |
| Localized sensation of heat           | 0 | 0 | 0 | 1 | 1 |
| Skin rash                             | 0 | 0 | 0 | 1 | 1 |
| Anaphylactic shock                    | 0 | 0 | 0 | 1 | 1 |
| Hypovolemic shock                     | 0 | 0 | 1 | 0 | 1 |
| Vasovagal syncope                     | 0 | 0 | 0 | 1 | 1 |
| Raynaud's syndrome                    | 1 | 0 | 0 | 0 | 1 |
| DRESS syndrome                        | 0 | 0 | 1 | 0 | 1 |
| Vertiginous syndrome                  | 0 | 0 | 1 | 0 | 1 |
| Hemorrhagic suffusion                 | 0 | 0 | 0 | 1 | 1 |
| Slumber                               | 0 | 0 | 0 | 1 | 1 |
| Abdominal spasm                       | 0 | 0 | 0 | 1 | 1 |
| Anxious state                         | 0 | 0 | 0 | 1 | 1 |
| State of agitation                    | 0 | 0 | 0 | 1 | 1 |
| Artery stenosis                       | 0 | 0 | 0 | 1 | 1 |
| Constipation                          | 0 | 0 | 0 | 1 | 1 |
| Stomatitis                            | 1 | 0 | 0 | 0 | 1 |
| Mental numbness                       | 1 | 0 | 0 | 0 | 1 |
| Sweats                                | 1 | 0 | 0 | 0 | 1 |
| Sweats                                | 1 | 0 | 0 | 0 | 1 |
| Tachypnea                             | 0 | 0 | 0 | 1 | 1 |
| Tension of the mandibular muscles     | 0 | 0 | 0 | 1 | 1 |
| Confused head                         | 0 | 0 | 0 | 1 | 1 |
| Muffled head                          | 0 | 0 | 1 | 0 | 1 |
| Button head                           | 0 | 0 | 0 | 1 | 1 |
| Tic                                   | 0 | 0 | 0 | 1 | 1 |
| Thoracoalgia                          | 0 | 0 | 1 | 0 | 1 |
| Hack                                  | 0 | 0 | 0 | 1 | 1 |
| Increased transaminases               | 0 | 0 | 1 | 0 | 1 |
| Finger tremor                         | 0 | 0 | 0 | 1 | 1 |
| High triglycerides                    | 1 | 0 | 0 | 0 | 1 |
| Thromboembolism of the lung           | 0 | 0 | 1 | 0 | 1 |
| Venous thromboembolism                | 0 | 0 | 0 | 1 | 1 |
| Deep thrombophlebitis                 | 1 | 0 | 0 | 0 | 1 |
| Thrombolysis                          | 0 | 0 | 1 | 0 | 1 |
| Thrombosis of the arm                 | 1 | 0 | 0 | 0 | 1 |
| Femoral artery thrombosis             | 0 | 0 | 1 | 0 | 1 |
| Axillary vein thrombosis              | 0 | 0 | 0 | 1 | 1 |

|                                 |     |    |     |      |      |
|---------------------------------|-----|----|-----|------|------|
| Thrombosis of varicose veins    | 1   | 0  | 0   | 0    | 1    |
| Venous thrombosis (limbs)       | 1   | 0  | 0   | 0    | 1    |
| Venous thrombosis of the arm    | 1   | 0  | 0   | 0    | 1    |
| Deep vein thrombosis of the arm | 0   | 0  | 0   | 1    | 1    |
| Left deep vein thrombosis       | 0   | 0  | 1   | 0    | 1    |
| Auricular swelling              | 0   | 1  | 0   | 0    | 1    |
| Attenuated hearing in both ears | 0   | 1  | 0   | 0    | 1    |
| Dark urine                      | 0   | 0  | 0   | 1    | 1    |
| Flushes in the face             | 0   | 0  | 1   | 0    | 1    |
| Hot flashes in the face         | 0   | 0  | 0   | 1    | 1    |
| Change in blood pressure        | 1   | 0  | 0   | 0    | 1    |
| Bleeding esophageal varices     | 0   | 0  | 0   | 1    | 1    |
| Cryoglobulinemic vasculitis     | 0   | 0  | 0   | 1    | 1    |
| Vasculitis of the fingers       | 0   | 0  | 0   | 1    | 1    |
| Diffuse vasculitis              | 0   | 0  | 0   | 1    | 1    |
| NAS Vasculitis                  | 0   | 0  | 0   | 1    | 1    |
| Vasoconstriction                | 0   | 0  | 0   | 1    | 1    |
| Peripheral vasodilation         | 0   | 0  | 0   | 1    | 1    |
| Relaxed vein                    | 1   | 0  | 0   | 0    | 1    |
| Varicose vein                   | 0   | 0  | 1   | 0    | 1    |
| Dilated veins                   | 0   | 0  | 0   | 1    | 1    |
| Varicose veins                  | 0   | 0  | 1   | 0    | 1    |
| Joint effusion                  | 0   | 0  | 0   | 1    | 1    |
| Blurred vision                  | 1   | 0  | 0   | 0    | 1    |
| Low vitamin D                   | 1   | 0  | 0   | 0    | 1    |
| Xerostomia                      | 0   | 0  | 0   | 1    | 1    |
| Total                           | 564 | 34 | 385 | 1468 | 2451 |
